# Supplementary material for: High-efficiency ternary polymer solar cells with optimized morphology of active layers enabled by few-layered β-InSe nanosheets
Source: Royal Society of Chemistry journal article supplement (doi:10.1039/d1nr00470k), 2021-01-01
Supplement: d1nr00470k1.pdf [file d1nr00470k1.pdf]

## Supporting information

### High-efficiency Ternary Polymer Solar Cells with Optimized Morphology of Active Layers Enabled by Few-Layered $\beta$ -InSe Nanosheets

Jianming Wang<sup>a,b</sup>, Huangzhong Yu<sup>a,c,d\*</sup>, Chunli Hou<sup>a</sup>

<sup>a</sup>School of Physics and Optoelectronics, South China University of Technology, 510640  
Guangzhou, China

<sup>b</sup>School of Materials Science & Engineering, South China University of Technology, 510640  
Guangzhou, China

<sup>c</sup>South China Institute of Collaborative Innovation, 523808 Dongguan, China

<sup>d</sup>State Key Lab of Subtropical Building Science, South China University of Technology,  
510640 Guangzhou, China

\*To whom correspondence should be addressed. E-mail: hzhyu@scut.edu.cn.

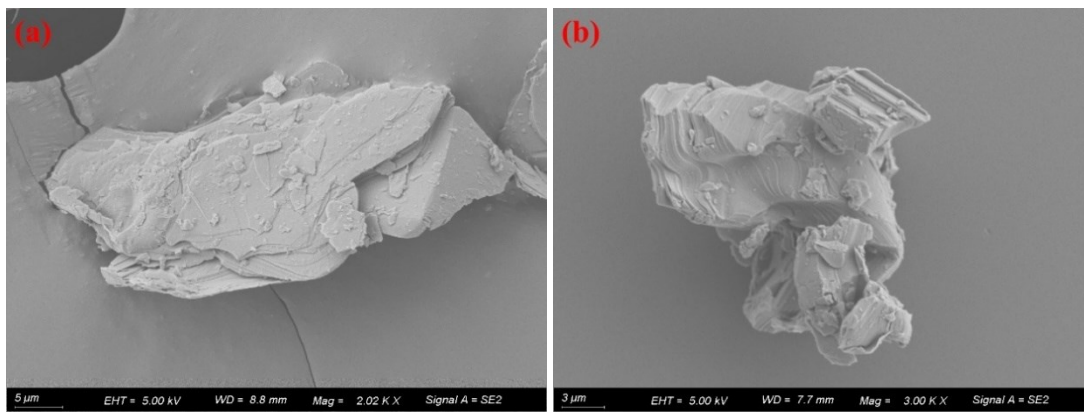

**Figure S1.** SEM images of bulk  $\beta$ -InSe.

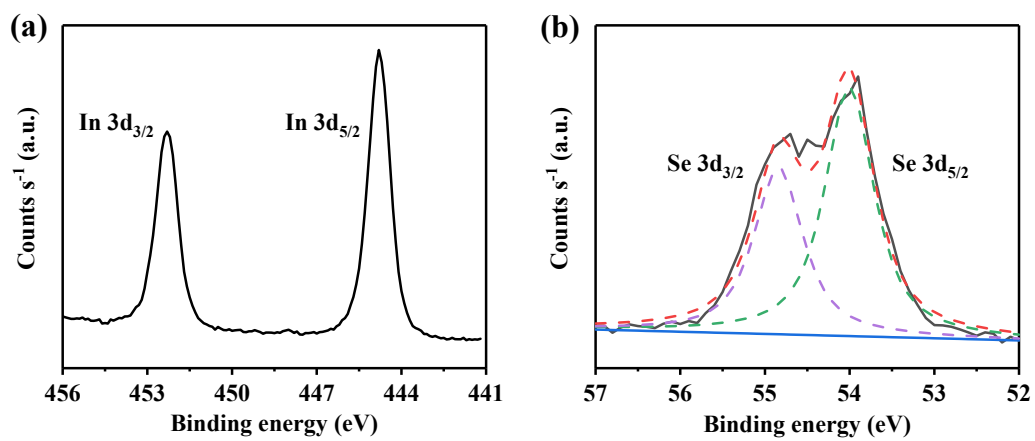

**Figure S2.** XPS spectra of the (a) In 3d and (b) Se 3d for the bulk  $\beta$ -InSe.

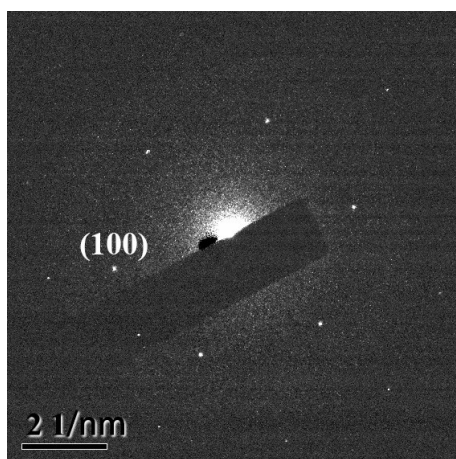

**Figure S3.** SAED pattern of a  $\beta$ -InSe nanosheet.

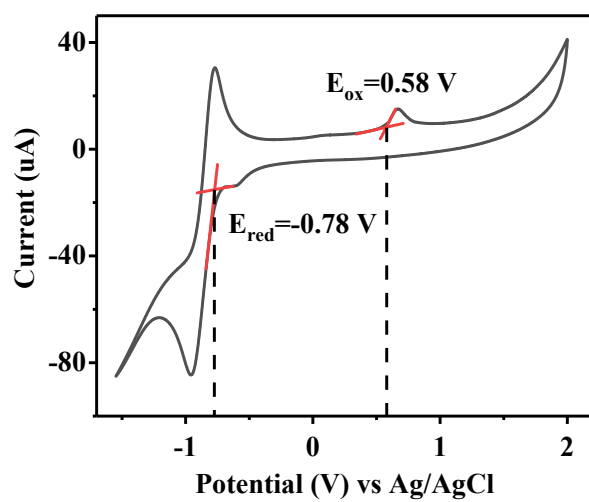

**Figure S4.** Cyclic voltammogram (vs. Ag/AgCl) of few-layered  $\beta$ -InSe.

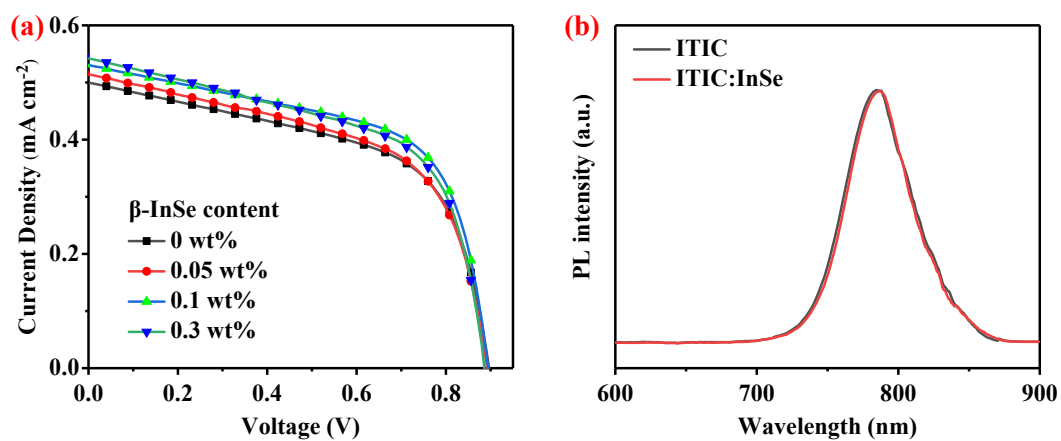

**Figure S5.** (a)  $J$ - $V$  curves of cells with PBDB-T:β-InSe (0, 0.05 wt%, 0.1 wt% and 0.3 wt%) as active layers. (b) PL spectra of ITIC and ITIC:β-InSe.

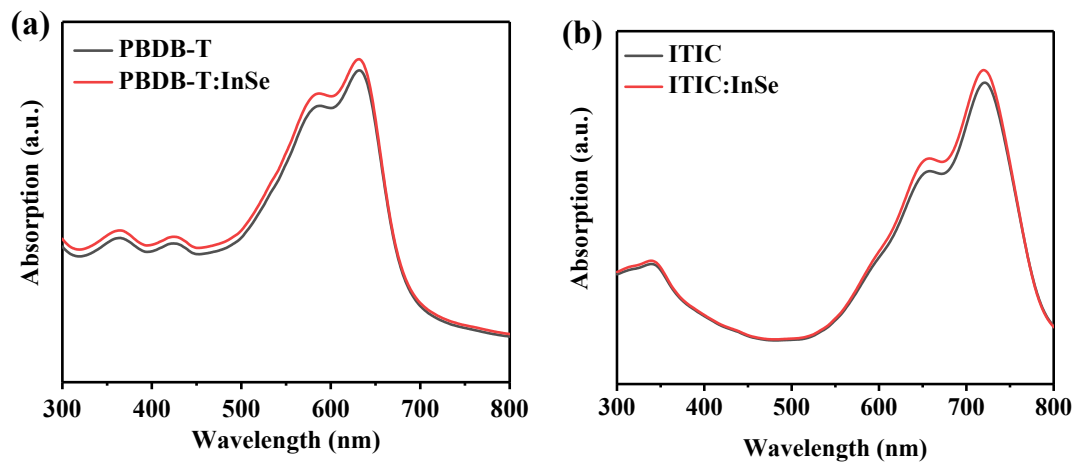

**Figure S6.** (a) Optical absorption spectra of PBDB-T and PBDB-T: $\beta$ -InSe. (b) Optical absorption spectra of ITIC and ITIC: $\beta$ -InSe.

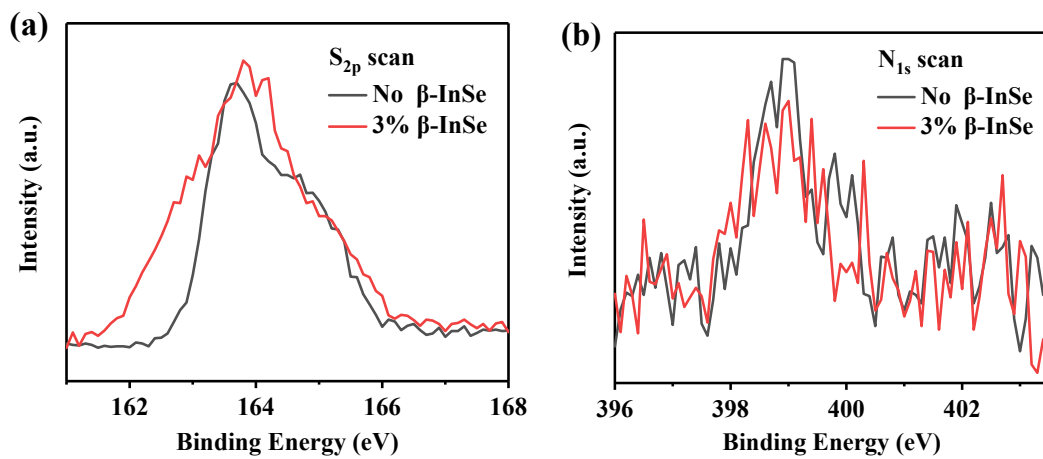

**Figure S7.** XPS spectra of the (a) S 2p region and (b) N 1s region obtained from PBDB-T:ITIC films with 0 and 0.3 wt%  $\beta$ -InSe.



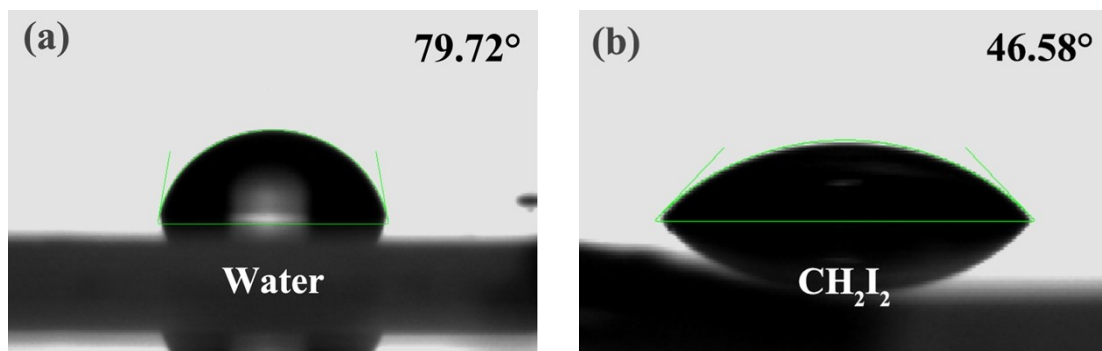

**Figure S8.** Contacts angles of (a) water and (b) CH<sub>2</sub>I<sub>2</sub> on few-layered  $\beta$ -InSe film.

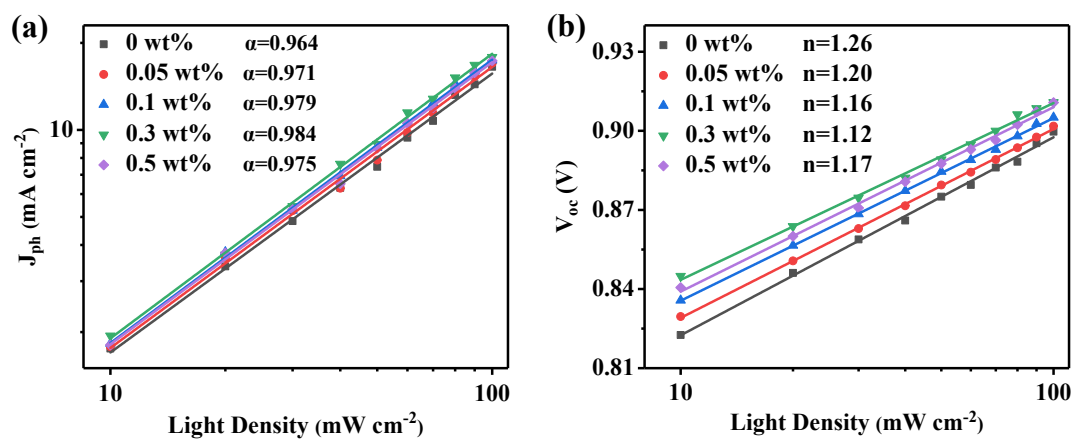

**Figure S9.** (a)  $J_{sc}$  and (b)  $V_{oc}$  versus light intensity characteristics of PBDB-T:ITIC:β-InSe-based PSCs with different additive ratio of β-InSe.

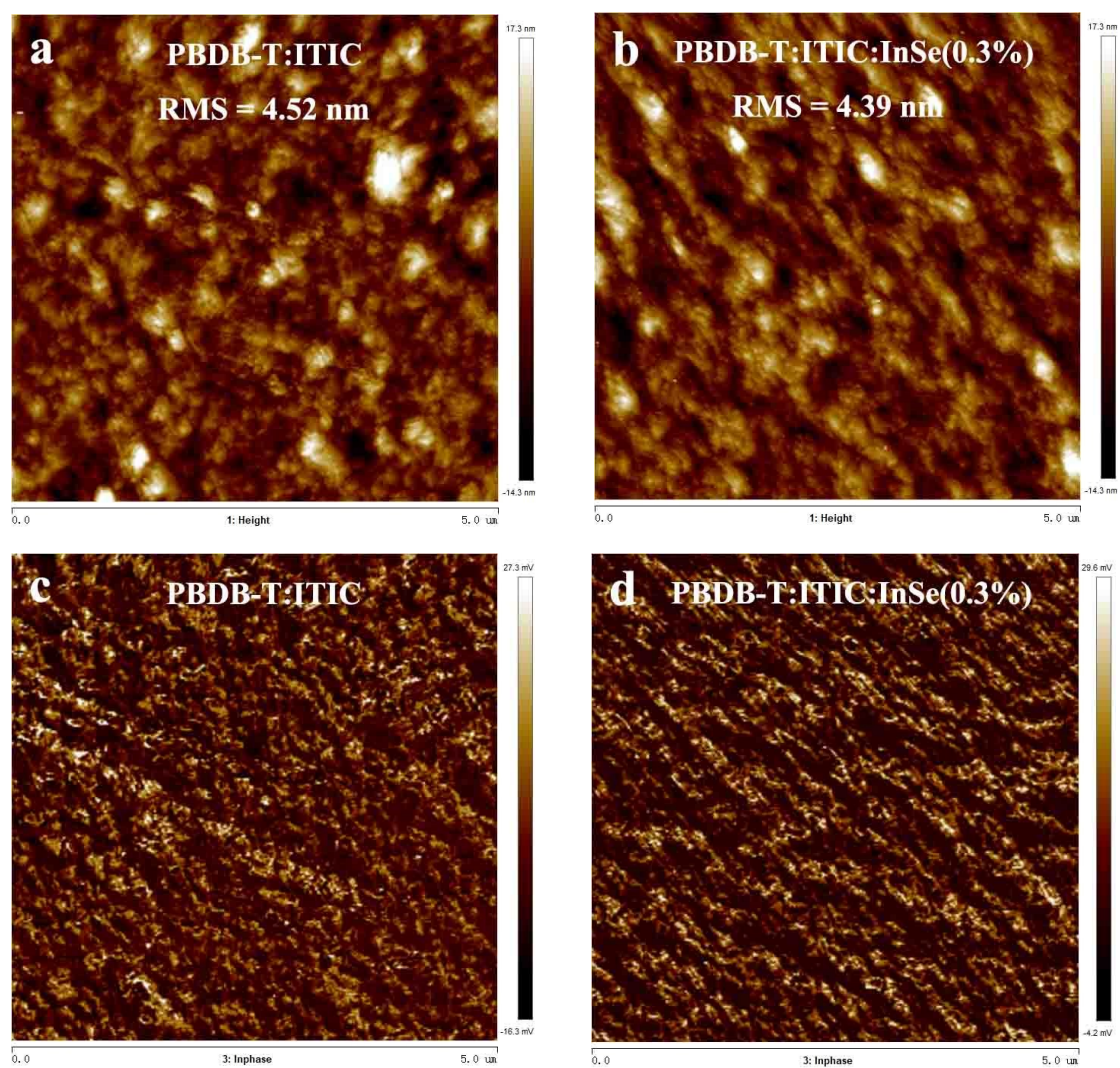

**Figure S10.** AFM (a) height images and (c) phase image of PBDB-T:ITIC film after storing 183 days; AFM (b) height images and (d) phase image of PBDB-T:ITIC:β-InSe (0.3 wt%) film after storing 183 days.

**Table S1.** Detailed photovoltaic parameters of the PM6:Y6: $\beta$ -InSe-based PSCs with different additive ratios of  $\beta$ -InSe.

| Active layer          | Concentration | $J_{sc}$<br>(mA cm <sup>-2</sup> ) | Calculated $J_{sc}$<br>(mA cm <sup>-2</sup> ) | $V_{oc}$<br>(V) | FF<br>(%) | PCE<br>(%) |
|-----------------------|---------------|------------------------------------|-----------------------------------------------|-----------------|-----------|------------|
| PM6:Y6: $\beta$ -InSe | 0             | 24.71                              | 23.86                                         | 0.83            | 73.35     | 15.02±0.20 |
|                       | 0.05 wt%      | 25.19                              | 24.15                                         | 0.83            | 74.63     | 15.60±0.19 |
|                       | 0.1 wt%       | 25.56                              | 24.62                                         | 0.83            | 75.42     | 16.01±0.17 |
|                       | 0.3 wt%       | 25.96                              | 25.03                                         | 0.83            | 76.53     | 16.55±0.17 |
|                       | 0.5 wt%       | 25.45                              | 24.50                                         | 0.83            | 75.31     | 15.92±0.18 |

**Table S2.** The diffraction vector values and crystal correlation lengths of the diffraction peaks in blend films.

| Blend film                           | Diffraction vector ( $\text{\AA}^{-1}$ ) |          | CCL (nm)  |          |
|--------------------------------------|------------------------------------------|----------|-----------|----------|
|                                      | OOP (010)                                | IP (100) | OOP (010) | IP (100) |
| PBDB-T:ITIC                          | 1.66                                     | 0.30     | 2.27      | 8.89     |
| PBDB-T:ITIC: $\beta$ -InSe (0.3 wt%) | 1.67                                     | 0.30     | 2.39      | 10.26    |
| PBDB-T:ITIC: $\beta$ -InSe (0.5 wt%) | 1.68                                     | 0.30     | 2.56      | 12.38    |

**Table S3.** XPS results of the surface of the PBDB-T:ITIC: $\beta$ -InSe (0 and 0.3 wt%) films.

| Active layer                         | Atomic concentration (%) |       | S/N Ratio |
|--------------------------------------|--------------------------|-------|-----------|
| PBDB-T:ITIC                          | S <sub>2p</sub>          | 6.54  | 5.74      |
|                                      | N <sub>1s</sub>          | 1.14  |           |
|                                      | C <sub>1s</sub>          | 89.62 |           |
|                                      | O <sub>1s</sub>          | 2.70  |           |
| PBDB-T:ITIC: $\beta$ -InSe (0.3 wt%) | S <sub>2p</sub>          | 3.50  | 10.61     |
|                                      | N <sub>1s</sub>          | 0.33  |           |
|                                      | C <sub>1s</sub>          | 93.41 |           |
|                                      | O <sub>1s</sub>          | 2.75  |           |

**Table S4.** Calculated surface energy components of  $\beta$ -InSe film.

| Contact angle                      |                                             |                                          |                                          |                               |
|------------------------------------|---------------------------------------------|------------------------------------------|------------------------------------------|-------------------------------|
| $\theta_{\text{water}} (^{\circ})$ | $\theta_{\text{CH}_2\text{I}_2} (^{\circ})$ | $\gamma_s^{\text{d}} (\text{mN m}^{-1})$ | $\gamma_s^{\text{p}} (\text{mN m}^{-1})$ | $\gamma_s (\text{mN m}^{-1})$ |
| 79.72                              | 46.58                                       | 31.93                                    | 5.35                                     | 37.28                         |

**Table S5.** Summary of  $J_{\text{sat}}$ ,  $J_{\text{max}}$ ,  $J_{\text{sc}}$ ,  $G_{\text{max}}$ ,  $J_{\text{max}}/J_{\text{sat}}$  and  $J_{\text{sc}}/J_{\text{sat}}$  values obtained from the PBDB-T:ITIC-based devices and the ternary devices with different concentrations of  $\beta$ -InSe.

| Doping concentration | $J_{\text{sat}}$ (mA cm <sup>-2</sup> ) | $J_{\text{max}}$ (mA cm <sup>-2</sup> ) | $J_{\text{sc}}$ (mA cm <sup>-2</sup> ) | $G_{\text{max}}$ (m <sup>-3</sup> s <sup>-1</sup> ) | $J_{\text{max}}/J_{\text{sat}}$ | $J_{\text{sc}}/J_{\text{sat}}$ |
|----------------------|-----------------------------------------|-----------------------------------------|----------------------------------------|-----------------------------------------------------|---------------------------------|--------------------------------|
| 0                    | 18.94                                   | 14.19                                   | 16.53                                  | 1.184×10 <sup>28</sup>                              | 74.95%                          | 87.28%                         |
| 0.05 wt%             | 19.16                                   | 14.75                                   | 17.02                                  | 1.198×10 <sup>28</sup>                              | 76.98%                          | 88.83%                         |
| 0.1 wt%              | 19.32                                   | 15.10                                   | 17.43                                  | 1.208×10 <sup>28</sup>                              | 78.17%                          | 90.22%                         |
| 0.3 wt%              | 19.51                                   | 16.00                                   | 17.85                                  | 1.219×10 <sup>28</sup>                              | 82.01%                          | 91.49%                         |
| 0.5 wt%              | 19.28                                   | 15.03                                   | 17.34                                  | 1.205×10 <sup>28</sup>                              | 77.95%                          | 89.94%                         |



**Table S6.** Electron and hole mobility of the PBDB-T:ITIC: $\beta$ -InSe devices with different concentrations of  $\beta$ -InSe.

| Doping concentration | $\mu_e$ (cm <sup>2</sup> V <sup>-1</sup> s <sup>-1</sup> ) | $\mu_h$ (cm <sup>2</sup> V <sup>-1</sup> s <sup>-1</sup> ) | $\mu_e/\mu_h$ |
|----------------------|------------------------------------------------------------|------------------------------------------------------------|---------------|
| 0                    | $1.87 \times 10^{-4}$                                      | $3.07 \times 10^{-4}$                                      | 0.61          |
| 0.05 wt%             | $2.60 \times 10^{-4}$                                      | $3.69 \times 10^{-4}$                                      | 0.70          |
| 0.1 wt%              | $3.78 \times 10^{-4}$                                      | $4.95 \times 10^{-4}$                                      | 0.76          |
| 0.3 wt%              | $4.52 \times 10^{-4}$                                      | $5.60 \times 10^{-4}$                                      | 0.81          |
| 0.5 wt%              | $3.63 \times 10^{-4}$                                      | $4.73 \times 10^{-4}$                                      | 0.76          |
